# Supplementary material for: Effects of 4-tert-butylpyridine on the quasi-Fermi levels of TiO2 films in the presence of different cations in dye-sensitized solar cells
Source: Royal Society of Chemistry journal article supplement (doi:10.1039/c1cp22832c), 2011-01-01
Supplement: c1cp22832c.pdf [file c1cp22832c.pdf]

Electronic Supplementary Information DOI: 10.1039/c1cp22832c

## Effects of 4-*tert*-Butylpyridine on the Quasi-Fermi Levels of TiO<sub>2</sub> Films in the Presence of Different Cations in Dye-Sensitized Solar Cells

Shufang Zhang,<sup>a</sup> Masatoshi Yanagida,<sup>a</sup> Xudong Yang,<sup>b</sup> Kun Zhang,<sup>a</sup> and Liyuan Han<sup>\*a</sup>

**Table S1.** Variation of  $V_{OC}$ ,  $J_{SC}$ , and QFL shifts with added TBP concentration in cells containing 0.1 M Li<sup>+</sup> or 0.1 M TBA<sup>+</sup> ions.<sup>a</sup>

|                                      | TBP conc.<br>(M) | $J_{SC}$<br>(mA/cm <sup>2</sup> ) | $E_{QFL,OC}$ ( $V_{OC}$ )<br>(V) | $E_{QFL,SC}$<br>(V) | $\Delta E_{QFL,OC}$ ( $V_{OC}$ )<br>(V) | $\Delta E_{QFL,SC}$<br>(V) |
|--------------------------------------|------------------|-----------------------------------|----------------------------------|---------------------|-----------------------------------------|----------------------------|
| Cells with<br>0.1 M Li <sup>+</sup>  | 0                | 10.62                             | 0.58                             | 0.32                | —                                       | —                          |
|                                      | 0.1              | 10.01                             | 0.68                             | 0.42                | 0.10 <sup>b</sup>                       | 0.10 <sup>b</sup>          |
|                                      | 0.2              | 9.92                              | 0.71                             | 0.45                | 0.13 <sup>b</sup>                       | 0.13 <sup>b</sup>          |
|                                      | 0.3              | 9.85                              | 0.72                             | 0.45                | 0.14 <sup>b</sup>                       | 0.13 <sup>b</sup>          |
|                                      | 0.5              | 9.08                              | 0.73                             | 0.47                | 0.15 <sup>b</sup>                       | 0.15 <sup>b</sup>          |
| Cells with<br>0.1 M TBA <sup>+</sup> | 0                | 8.20                              | 0.70                             | 0.52                | —                                       | —                          |
|                                      | 0.3              | 6.32                              | 0.78                             | 0.65                | 0.08 <sup>c</sup>                       | 0.13 <sup>c</sup>          |
|                                      | 0.5              | 5.83                              | 0.78                             | 0.64                | 0.08 <sup>c</sup>                       | 0.12 <sup>c</sup>          |

<sup>a</sup>All the potentials were measured with respect to the equilibrium redox potential of the electrolyte.

<sup>b</sup> $\Delta E_{QFL,OC}$  ( $V_{OC}$ ) and  $\Delta E_{QFL,SC}$  refer to the values at various TBP concentrations with respect to those at 0 M TBP in cells containing 0.1 M Li<sup>+</sup>

<sup>c</sup> $\Delta E_{QFL,OC}$  ( $V_{OC}$ ) and  $\Delta E_{QFL,SC}$  refer to the values at various TBP concentrations with respect to those at 0 M TBP in cells containing 0.1 M TBA<sup>+</sup>.
